# Supplementary material for: MR-labelled liposomes and focused ultrasound for spatiotemporally controlled drug release in triple negative breast cancers in mice
Source: PubMed Central journal article supplement (PMC7806456; doi:10.7150/ntno.52168), 2021-01-01
Supplement: ntnov05p0125s1.pdf [file ntnov05p0125s1.pdf]

## Supplementary Materials

### MR-labelled liposomes and focused ultrasound for spatiotemporally controlled drug release in triple negative breast cancers

Maral Amrahli, Miguel Centelles, Paul Cressey, Martynas Prusevicius, Wladyslaw Gedroyc, Xiao Yun Xu, Po-Wah So, Michael Wright, and Maya Thanou

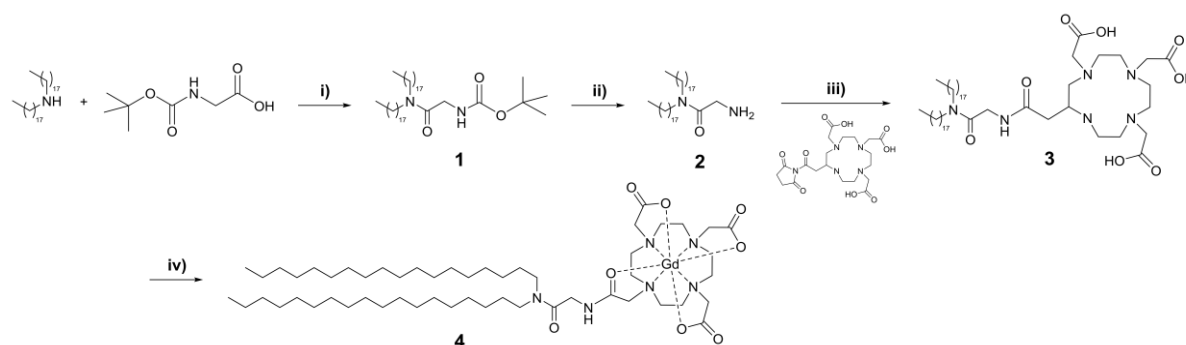

**Scheme S1. Synthesis of Gd.DOTA.DSA.** Reagents and conditions: (i) dioctadecylamine, HBTU, DMAP, OH.Gly.NH.Boc, dry  $\text{CHCl}_3$ , RT; **1** = 90 %; (ii) TFA: DCM (3:7), RT; **2** = 95 %; (iii) NHS-DOTA, TEA, dry  $\text{CH}_2\text{Cl}_2$ , 35 °C; **3** = 76 %; (iv)  $\text{GdCl}_3 \cdot 6\text{H}_2\text{O}$ ,  $\text{H}_2\text{O}$ , slow reflux; **4** = 82 %. **2. DSA.**  $^1\text{H}$  (400 MHz;  $\text{CDCl}_3$ ; 296 K)  $\delta$  3.84 (s, 2H,  $\text{OCCH}_2\text{NH}_2$ ), 3.29 (t,  $J = 8.0$  Hz, 2H,  $\text{OCNCH}_2$ ), 3.11 (t,  $J = 7.8$  Hz, 2H,  $\text{OCNCH}_2$ ), 1.50 (m, 4H,  $\text{OCNCH}_2\text{CH}_2$ ), 1.25 (s, 60H, alky chain  $\text{CH}_2$ ), 0.88 (t,  $J = 6.3$  Hz, 6H,  $\text{CH}_3$ );  $^{13}\text{C}$  (100 MHz;  $\text{CD}_2\text{Cl}_2$ ; 296 K)  $\delta$  166.6 (OCN) 48.8 & 48.1 ( $\text{OCNCH}_2$ ), 41.6 ( $\text{OCCH}_2\text{NH}_2$ ), 31.1 ( $\text{CH}_3\text{CH}_2\text{CH}_2$ ), 30.9-30.8 (alkyl chain  $\text{CH}_2$ ), 29.9 ( $\text{OCNCH}_2\text{CH}_2\text{CH}_2\text{CH}_2$ ), 28.8-28.3 ( $\text{OCNCH}_2\text{CH}_2\text{CH}_2$ ), 24.2 ( $\text{CH}_3\text{CH}_2$ ), 15.4 ( $\text{CH}_3$ ). TLC (15% MeOH in  $\text{CH}_2\text{Cl}_2$  with 0.5 %  $\text{NH}_3$ ) gave  $R_f$  0.55 with the DSA spot showing red after sequential vanillin and ninhydrin stains. ESI-MS calcd. for  $\text{C}_{38}\text{H}_{78}\text{N}_2\text{O}$   $[\text{M}+\text{H}]^+$ : 579.8 a.m.u. Found  $[\text{M}+\text{H}]^+$  579.7 a.m.u. **3. DOTA.DSA.**  $^1\text{H}$  (400 MHz;  $\text{CDCl}_3/\text{CD}_3\text{OD}$ )  $\delta$  3.45 (br, 2H,  $\text{NCH}_2\text{CONH}$ ), 3.10 (br, 6H,  $\text{NCH}_2\text{COOH}$ ), 3.00 (br, 2H,  $\text{OCNCH}_2$ ), 2.80 (br, 16H,  $\text{NCH}_2\text{CH}_2\text{N}$ ), 2.28 (br, 2H,  $\text{OCNCH}_2$ ), 2.16 (br, 2H,  $\text{OCCH}_2\text{NH}$ ), 1.44 (m, 4H,  $\text{OCNCH}_2\text{CH}_2$ ), 1.18 (s, 60H, alky chain  $\text{CH}_2$ ), 0.80 (t,  $J = 6.6$  Hz, 6H,  $\text{CH}_3$ ).  $^{13}\text{C}$  (100 MHz;  $\text{CD}_2\text{Cl}_2/\text{CD}_3\text{OD}$ ; 296 K)  $\delta$  47.0 ( $\text{OCNCH}_2$ ), 41.5-38.5 ( $\text{NCH}_2\text{CH}_2\text{N}$  &  $\text{NCH}_2\text{COOH}$ ), 32.3 ( $\text{CH}_3\text{CH}_2\text{CH}_2$ ), 31.5-28.5 (alkyl chain  $\text{CH}_2$ ), 22.9 ( $\text{CH}_3\text{CH}_2$ ), 14.1 ( $\text{CH}_3$ ); others could not be distinguished. ESI-MS calcd. for  $\text{C}_{54}\text{H}_{104}\text{N}_6\text{O}_8$   $[\text{M}+\text{H}]^+$ : 965.8 a.m.u. Found  $[\text{M}+\text{H}]^+$  965.7 a.m.u with major fragments seen at 579.6, 522.3, 444.1 and 387.1 a.m.u. corresponding to **2**,  $(\text{C}_{18})_2\text{NH}$ , DOTA-glycine and DOTA respectively. **4. Gd.DOTA.DSA.** The presence of Gd disrupted the  $^1\text{H}$  and  $^{13}\text{C}$  NMR spectra. ESI-MS calcd. for  $\text{C}_{54}\text{H}_{101}\text{GdN}_6\text{O}_8$   $[\text{M}+\text{H}]^+$ : 1120.7 a.m.u. Found  $[\text{M}+\text{H}]^+$  1120.6 a.m.u. with major fragments seen at 1076.5, 1032.5, 1005.7, and 988.8 a.m.u. (all + p ESI) corresponding to loss of COO, 2x COO, 2x  $\text{CH}_2\text{COO}$ , and 3x COO respectively.

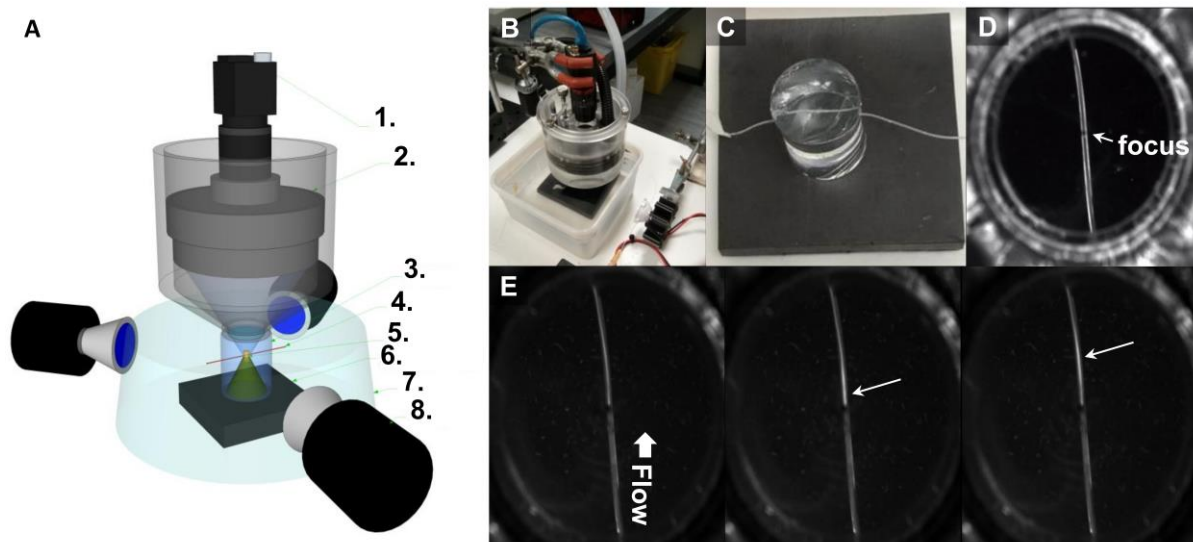

**Figure S1. Assessing doxorubicin release under FUS, measured by intrinsic doxorubicin fluorescence; (A)** schematic showing a polyacryamide gel embedded flow-tube, light source and camera, around a FUS system; 1. camera, lens, and filter; 2. transducer; 3. gel block; 4. flow tube; 5. focus; 6. acoustic foam; 7. water bath; 8. LED lights; **(B)** photographs of the setup around the transducer; **(C)** close up of the gel block and flow tube; **(D)** view showing the flow-tube and an indication of the FUS focus with the fine-wire thermocouple visible in reflection. Pulsed FUS insonation of a flowing iTSL stream then causes synchronised fluorescence intensity increases, indicating boluses of released doxorubicin; **(E)** Three representative frames showing (left to right) FUS-off, start of FUS and fluorescence increase, and FUS-off again and wash out of the release doxorubicin bolus.

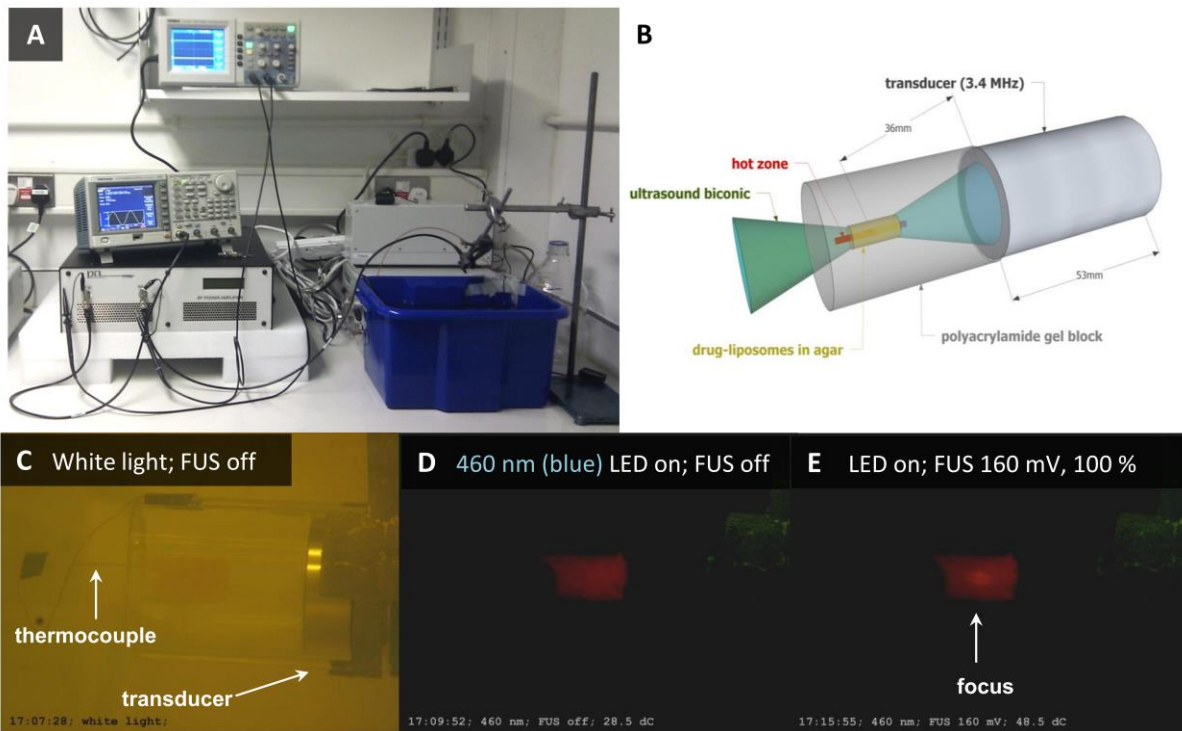

**Figure S2. Supporting data for the assessment of FUS-induced doxorubicin release:** (A, B) this prototype used a 3.4 MHz FUS transducer (Precision Acoustics, UK) focused on iTSL-DOX / agar phantoms embedded in a larger polyacrylamide gel block. Low gel-point agar allowed the iTSL-DOX to be immobilised without heating above the  $T_m$ , while the polyacrylamide allow for placement and retention without interfering with FUS transmission. Focus temperature was measured with a fine-wire thermocouple and doxorubicin release by intrinsic fluorescence using a monochromatic LED (460 nm) source, combined with a domestic camera with glass photographic ('G') filters and video collection settings. This approach was sufficient for a proof-of-principle but had limitations of poor spectral specificity and low frame rates (6-8 fps). Example frames showing (C) embedded iTSL-DOX/agar as a pale pink cylinder under white light. The encasing polyacrylamide is optically clear, while the supporting acrylic cylinder can be seen, along with the transducer face on the right; (D) Under blue light but no FUS the encapsulated doxorubicin shows deep-red fluorescence; (E) This significantly increases in brightness once the FUS is turned on (160 mV input to amplifier; 100 % duty cycle). This change is irreversible and demonstrates the fluorescence de-quenching seen from iTSL-released doxorubicin.

See also: <http://youtu.be/N6N6GgY49CA>

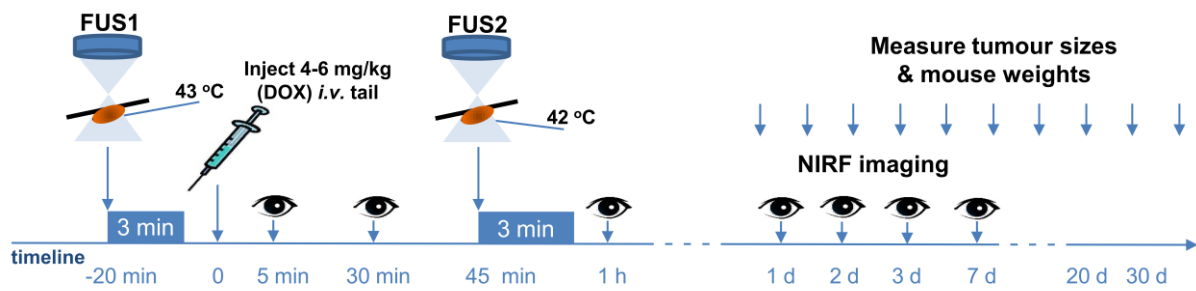

**Figure S3. Preclinical FUS studies; Study outline** - once tumours were ~ 5 mm each animal received: (i) a leading FUS treatment (42-43 °C; 3 min); (ii) injection of iTSL-DOX at  $t = 0$ ; (iii) a second FUS treatment (42 °C for 3 min) applied once imaging observed iTSL-DOX had accumulated in the tumour; (iv) monitoring by whole body NIRF, tumour sizing, and weight measurement until the end of the study.

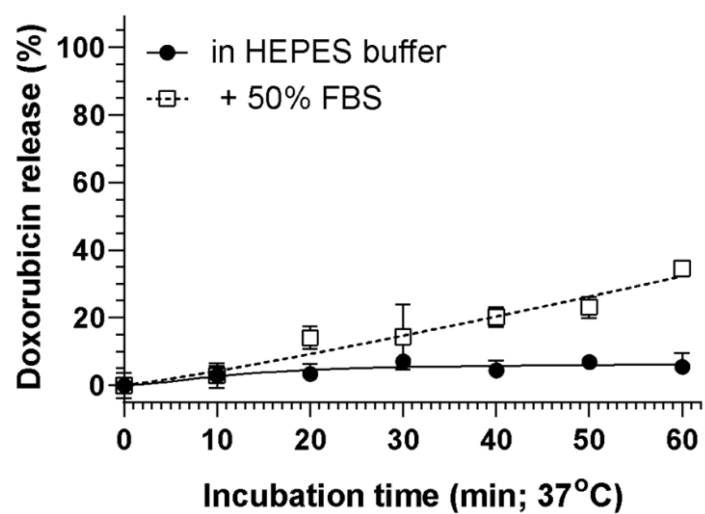

**Figure S4.** Effect of serum on doxorubicin release from iTSL-DOX samples incubated at 37 °C for up to 60 min in buffer (50 mM HEPES with 5 w% glucose; pH 7.4), compared with buffer containing 50 v% foetal bovine serum (FBS) as a blood analogue. Release was monitored by the increase of intrinsic doxorubicin fluorescence ( $Ex_{480} / Em_{590}$  nm) as it leaves the self-quenched encapsulated state. N = 3, values are mean  $\pm$  SD.

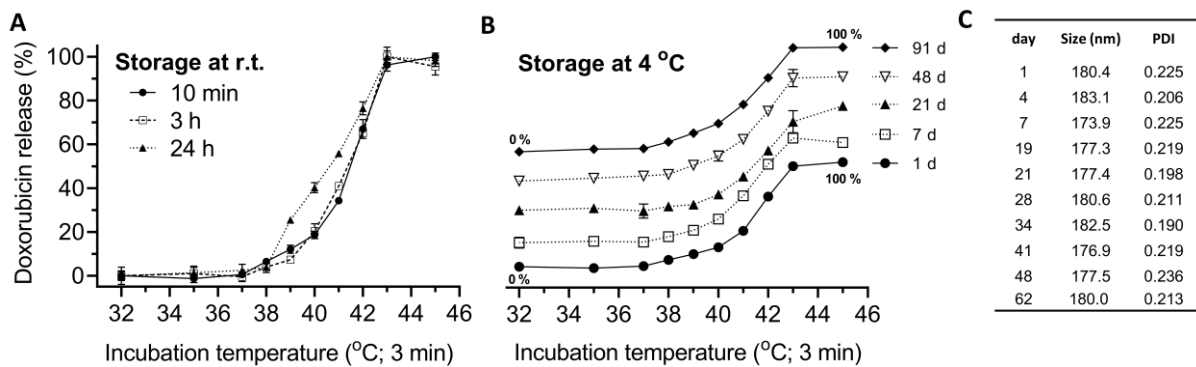

**Figure S5. Storage stability of iTSL-DOX;** Doxorubicin release was studied by incubating samples for 3 min at 32-46 °C. The graphs show %release for stocks either left at **(A)** room temperature for 10 min, 3 h, or 24 h (n = 3; mean ± SD) or in; **(B)** cold storage at ~ 5 °C (stacked curves; n = 3; mean ± SD). Little or no change is seen in the thermal release profiles as the liposomes ages; **(C)** representative average particle diameter and PDI data also shows no significant changes on storage for 2 months.

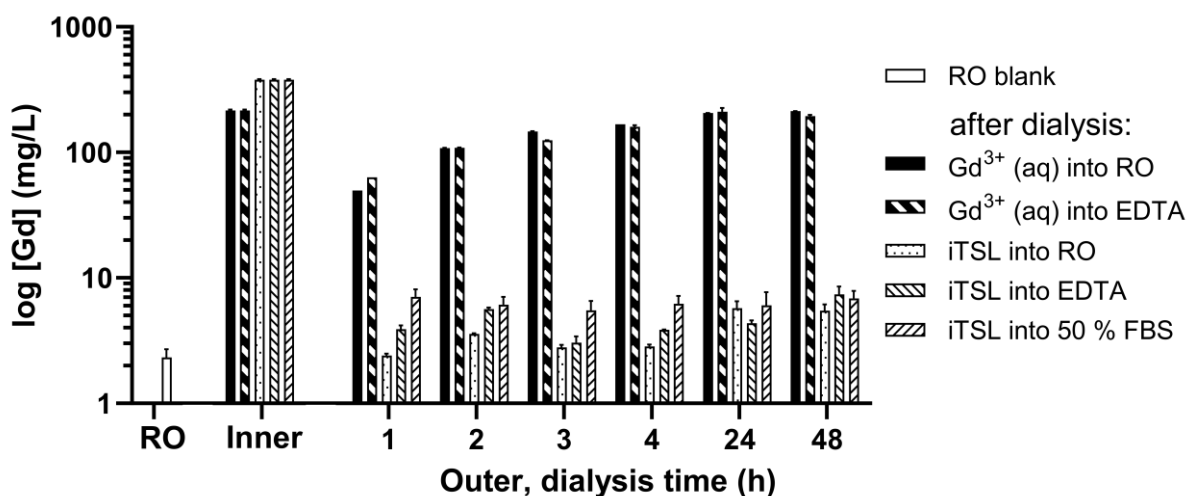

**Figure S6. Gadolinium leakage analysis using dialysis membranes and total reflection X-ray fluorescence (TXRF).** The potential for loss of the metal from Gd.DOTA.DSA was established by assaying the amount of Gd<sup>3+</sup> able to escape through a dialysis membrane from an inner chamber containing either 0.2 mg/mL gadolinium standard or iTSL (equivalent to 0.38 mg/mL Gd) and into a cuvette containing reverse osmosis (RO) grade water at RT or 50 % (v/v) fetal bovine serum at 4 °C (to avoid serum degradation). The cuvettes were placed on a magnetic stirrer and 10 µL samples were taken at 1-48 h time points. These were analysed to determine the concentration of gadolinium (n = 3; mean ± SD). A scaled baseline is also given for n = 11 samples of RO water.

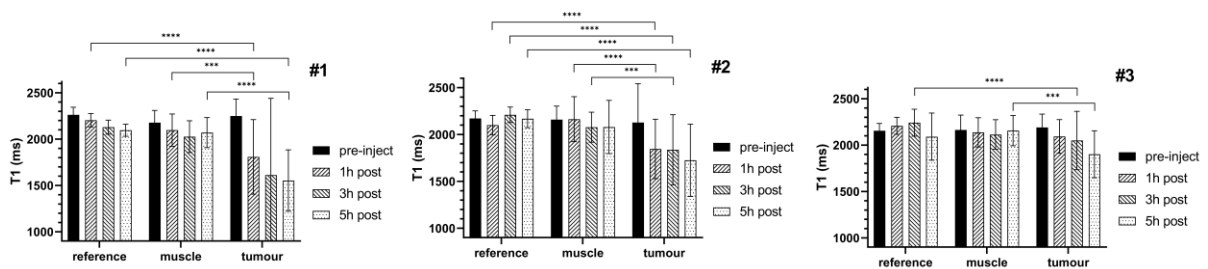

**Figure S7. Collated pixel intensities from matched ROIs in all  $T_1$  map slices** underwent frequency distribution analysis in Prism (Graphpad Software, San Diego CA, USA) with bin-width 50 over 800-3000 units. The resulting histograms were then non-linear regression fit to Gaussian curves and the resulting best-fit value means and S.D.s (equivalent to the distribution breadth) cross-compared for each animal ( $n = 3$ ), time-point, and ROI. Significance markers refer to ANOVA 1-way analyses on the collated raw data using default settings: \*\*\*  $P < 0.0002$ , \*\*\*\*  $P < 0.0001$ . Little or no difference is seen from neither the Gadovist reference nor the muscle tissue controls. Significant mean reduction is seen in the majority of tumours immediately post-injection. There is often an increase in the distribution SD, signifying significant heterogeneity. This likely relates to the increased tumour vascularity and/or the presence of a low-infusion core.



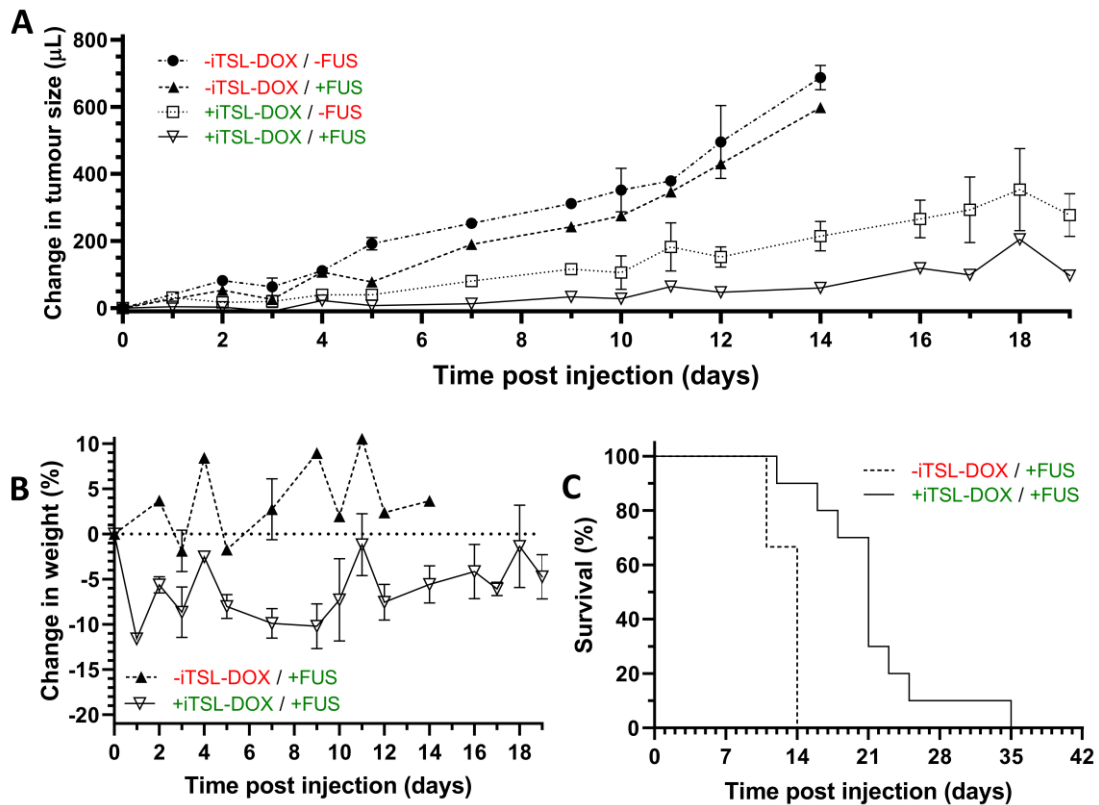

**Figure S8. Double-tumour mouse studies** with only the right-side tumour treated by FUS. The groups were: nil-drug  $\pm$  FUS ( $n = 3$ ) and iTSL-DOX  $\pm$  FUS ( $n = 10$ ); **(A)** average tumour sizes (mean  $\pm$  SEM). Mice were injected (*i. v. tail*) to 6 mg/kg equivalent doxorubicin on day 0 and FUS treatment was applied pre/post injection; **(B)** average body weights and; **(C)** Kaplan-Meier plots showing survival. Weights are given as mean  $\pm$  SEM.

For these double-tumour studies, mouse survival is limited by the growth of the non-FUS tumour, which receives only a reduced dosage of iTSL-DOX. The approach allows for more direct comparison of the effects of FUS across the two tumours of the same animal but reduces overall survival improvements compared to the single-tumour studies.

| Formulation                       | T <sub>on</sub> | T <sub>m</sub> | T <sub>cl</sub> |
|-----------------------------------|-----------------|----------------|-----------------|
| 100 mol% DPPC                     | 39.3            | 41.7           | 42.8            |
| 30 mol% Gd.DOTA.DSA, 70 mol% DPPC | 39.4            | 41.6           | 42.4            |
| Reference LTSL                    | 40.2            | 42.1           | 43.7            |
| iTSL                              | 41.2            | 43.3           | 45.8            |

**Table S1.** Measurements carried out on a TA Instruments Nano DSC in HEPES/glucose buffer, against a reference of the same. Values are indicative examples with estimated error  $\pm 0.2$  °C. T<sub>on/cl</sub> are calculated as the first and last temperatures at which the thermal power is 5 % of T<sub>m</sub>.
